# Supplementary material
Source: PubMed Central journal article supplement (PMC4657729)
Supplement: NIHMS675659-supplement-supplemental_material.pdf [file NIHMS675659-supplement-supplemental_material.pdf]

## SUPPLEMENTAL MATERIAL

**Supplemental Table 1.** Patient Baseline Characteristics by Interview Status at 12-Months.

| Description                   | Not Interviewed<br>N=623 (18%) | Interviewed<br>N=2878 (82%) | P-value |
|-------------------------------|--------------------------------|-----------------------------|---------|
| <b>Socio-Demographics (%)</b> |                                |                             |         |
| Age: Mean (SD)                | 46.2±6.6                       | 47.1±6.1                    | 0.0003  |
| Age: Median (IQR)             | 47 (9)                         | 48 (8)                      | 0.0033  |
| Female                        | 64.21                          | 67.72                       | 0.0904  |
| Race                          |                                |                             |         |
| Black                         | 19.74                          | 14.84                       | 0.0019  |
| White                         | 73.03                          | 79.46                       |         |
| Other                         | 7.22                           | 5.70                        |         |
| Hispanic*                     | 11.08                          | 6.95                        | 0.0005  |
| Marital Status                |                                |                             | 0.0000  |
| With partner                  | 49.92                          | 59.69                       |         |
| Without partner               | 48.96                          | 39.23                       |         |
| Other                         | 1.12                           | 1.08                        |         |
| Education Status/attainment   |                                |                             | 0.0023  |
| Unknown                       | 2.57                           | 1.77                        |         |
| Less than high school         | 5.30                           | 5.28                        |         |
| High school graduate          | 46.39                          | 39.19                       |         |

|                              |       |       |        |
|------------------------------|-------|-------|--------|
| More than high school        | 45.75 | 53.75 |        |
| Employment/Working Status    |       |       | 0.0000 |
| Working full-time            | 43.34 | 52.71 |        |
| Working part-time            | 10.11 | 10.67 |        |
| Not working                  | 46.55 | 36.62 |        |
| Has health insurance         | 73.19 | 81.41 | 0.0000 |
| Avoid healthcare due to cost | 32.74 | 29.60 | 0.1215 |
| Location: Spain              | 14.77 | 14.73 | 0.9823 |

---

**Cardiac Risk Factors (%)**

|                            |       |       |        |
|----------------------------|-------|-------|--------|
| Smoked within last 30 days | 66.13 | 58.13 | 0.0002 |
| History of Diabetes        | 40.29 | 33.63 | 0.0016 |
| History of hypertension    | 68.54 | 62.20 | 0.0029 |
| History of dyslipidemia    | 66.77 | 66.23 | 0.7933 |
| Family history of CAD      | 67.26 | 72.48 | 0.0088 |
| BMI>30                     | 49.12 | 47.85 | 0.5647 |

---

**Medical History (%)**

|                          |       |       |        |
|--------------------------|-------|-------|--------|
| Prior CAD                | 24.08 | 18.14 | 0.0006 |
| Prior angina/stable CAD  | 30.98 | 26.16 | 0.0141 |
| Prior stroke/TIA         | 5.78  | 3.86  | 0.0093 |
| Prior PAD                | 3.37  | 2.02  | 0.0389 |
| History of Sleep Apnea   | 5.14  | 4.48  | 0.4797 |
| Congestive Heart Failure | 7.38  | 3.30  | 0.0000 |
| Renal dysfunction        | 13.32 | 9.69  | 0.0070 |

---

---

**Non-Cardiac Co-morbidities (%)**

|                                       |       |       |        |
|---------------------------------------|-------|-------|--------|
| History of alcohol abuse              | 10.11 | 5.84  | 0.0001 |
| History of illicit drug use           | 11.88 | 6.74  | 0.0000 |
| Autoimmune Disorders                  | 3.69  | 2.95  | 0.3338 |
| Chronic Obstructive Pulmonary Disease | 11.08 | 10.08 | 0.4561 |
| Depression                            | 38.52 | 40.24 | 0.4286 |
| Cancer                                | 3.21  | 3.41  | 0.8069 |

---

**Disease Severity (%)**

|                                              |       |       |        |
|----------------------------------------------|-------|-------|--------|
| Initial HR (BPM): Mean (SD)                  | 19.41 | 20.52 | 0.0161 |
| Initial HR (BPM): Median (QR)                | 24.00 | 25.00 | 0.0008 |
| Initial SBP (mmHg): Mean (SD)                | 33.68 | 30.21 | 0.1876 |
| Initial SBP (mmHg): Median (QR)              | 42.50 | 36.00 | 0.5324 |
| ST-segment elevation                         | 52.17 | 51.63 | 0.8090 |
| Ejection fraction <40%                       | 13.32 | 9.90  | 0.0116 |
| GRACE score: Median (QR)                     | 27.00 | 25.00 | 0.3255 |
| Peak troponin: Median (QR)                   | 31.81 | 27.02 | 0.1433 |
| Presentation within 6 hours of symptom onset | 55.54 | 58.23 | 0.2166 |

---

**Hospital Procedures (%)**

|                                   |       |       |        |
|-----------------------------------|-------|-------|--------|
| Diagnostic angiography            | 92.46 | 95.07 | 0.0090 |
| Primary PCI                       | 48.80 | 48.12 | 0.7607 |
| Use of coronary revascularization |       |       |        |
| CABG                              | 9.95  | 8.10  |        |

|      |       |       |        |
|------|-------|-------|--------|
| PCI  | 68.86 | 72.62 | 0.1323 |
| None | 21.19 | 19.28 |        |

---

Abbreviations: BMI= body mass index, CAD= coronary artery disease, TIA= transient ischemic attack, PAD= peripheral artery disease, SBP= systolic blood pressure, AMI= acute myocardial infarction, PCI= percutaneous coronary intervention, CABG= coronary artery bypass grafting

\*In Spain, the default race/minority is classified as white, non-Hispanic.

**Supplemental Table 2.** Independent Effect of Sex on Health Status Scores (Full sequential model).

---

|                              | <b>Parameter</b>     |                 |                 |                |
|------------------------------|----------------------|-----------------|-----------------|----------------|
|                              | <b>Estimate (PE)</b> | <b>Lower PE</b> | <b>Upper PE</b> | <b>P-value</b> |
| <hr/> <b>SF-12 PCS score</b> |                      |                 |                 |                |
| Unadjusted                   | -3.8012              | -4.5113         | -3.0911         | 0.0000         |
| Adjusted #1                  | -3.8019              | -4.5119         | -3.0919         | 0.0000         |
| Adjusted #2                  | -3.2786              | -3.9810         | -2.5763         | 0.0000         |
| Adjusted #3                  | -1.7493              | -2.3987         | -1.0998         | 0.0000         |
| Adjusted #4                  | -1.6436              | -2.2824         | -1.0048         | 0.0000         |
| Adjusted #5                  | -1.7667              | -2.3916         | -1.1417         | 0.0000         |
| Adjusted #6                  | -1.0419              | -1.6785         | -0.4053         | 0.0014         |
| Adjusted #7                  | -0.9600              | -1.5973         | -0.3228         | 0.0032         |
| <hr/> <b>SF-12 MCS score</b> |                      |                 |                 |                |
| Unadjusted                   | -4.3885              | -5.0377         | -3.7392         | 0.0000         |
| Adjusted #1                  | -4.4051              | -5.0508         | -3.7594         | 0.0000         |
| Adjusted #2                  | -4.3153              | -4.9611         | -3.6696         | 0.0000         |
| Adjusted #3                  | -3.7733              | -4.4199         | -3.1268         | 0.0000         |
| Adjusted #4                  | -3.7657              | -4.4140         | -3.1174         | 0.0000         |
| Adjusted #5                  | -3.8288              | -4.4777         | -3.1798         | 0.0000         |
| Adjusted #6                  | -2.4088              | -3.0392         | -1.7783         | 0.0000         |
| Adjusted #7                  | -2.3649              | -2.9977         | -1.7321         | 0.0000         |
| <hr/> <b>EQ-5D UI score</b>  |                      |                 |                 |                |

|             |         |         |         |        |
|-------------|---------|---------|---------|--------|
| Unadjusted  | -7.2853 | -8.4407 | -6.1299 | 0.0000 |
| Adjusted #1 | -7.3272 | -8.4766 | -6.1779 | 0.0000 |
| Adjusted #2 | -6.8596 | -8.0085 | -5.7108 | 0.0000 |
| Adjusted #3 | -4.6551 | -5.7524 | -3.5577 | 0.0000 |
| Adjusted #4 | -4.5101 | -5.6054 | -3.4148 | 0.0000 |
| Adjusted #5 | -4.5962 | -5.6812 | -3.5112 | 0.0000 |
| Adjusted #6 | -2.5737 | -3.6453 | -1.5021 | 0.0000 |
| Adjusted #7 | -2.4999 | -3.5747 | -1.4251 | 0.0000 |

---

**EQ-5D VAS**

|             |         |         |         |        |
|-------------|---------|---------|---------|--------|
| Unadjusted  | -4.5311 | -5.7221 | -3.3400 | 0.0000 |
| Adjusted #1 | -4.6082 | -5.7939 | -3.4225 | 0.0000 |
| Adjusted #2 | -4.4385 | -5.6277 | -3.2492 | 0.0000 |
| Adjusted #3 | -2.6996 | -3.8604 | -1.5387 | 0.0000 |
| Adjusted #4 | -2.5760 | -3.7299 | -1.4221 | 0.0000 |
| Adjusted #5 | -2.7656 | -3.9086 | -1.6227 | 0.0000 |
| Adjusted #6 | -1.2058 | -2.3642 | -0.0474 | 0.0414 |
| Adjusted #7 | -1.1426 | -2.3057 | 0.0205  | 0.0543 |

---

**SAQ Physical Limitation**

|             |         |         |         |        |
|-------------|---------|---------|---------|--------|
| Unadjusted  | -6.0024 | -7.1426 | -4.8623 | 0.0000 |
| Adjusted #1 | -6.0579 | -7.1911 | -4.9246 | 0.0000 |
| Adjusted #2 | -5.3274 | -6.4558 | -4.1989 | 0.0000 |
| Adjusted #3 | -3.6700 | -4.7682 | -2.5718 | 0.0000 |
| Adjusted #4 | -3.7518 | -4.8475 | -2.6561 | 0.0000 |

|             |         |         |         |        |
|-------------|---------|---------|---------|--------|
| Adjusted #5 | -3.9018 | -4.9743 | -2.8293 | 0.0000 |
| Adjusted #6 | -2.5918 | -3.6831 | -1.5006 | 0.0000 |
| Adjusted #7 | -2.4438 | -3.5390 | -1.3485 | 0.0000 |

---

**SAQ Angina frequency**

|             |         |         |         |        |
|-------------|---------|---------|---------|--------|
| Unadjusted  | -3.4742 | -4.4309 | -2.5175 | 0.0000 |
| Adjusted #1 | -3.5184 | -4.4724 | -2.5644 | 0.0000 |
| Adjusted #2 | -3.0007 | -3.9532 | -2.0483 | 0.0000 |
| Adjusted #3 | -2.0426 | -2.9987 | -1.0865 | 0.0000 |
| Adjusted #4 | -2.0961 | -3.0530 | -1.1392 | 0.0000 |
| Adjusted #5 | -2.1751 | -3.1103 | -1.2399 | 0.0000 |
| Adjusted #6 | -1.1958 | -2.1523 | -0.2394 | 0.0143 |
| Adjusted #7 | -1.0309 | -1.9899 | -0.0720 | 0.0352 |

---

**SAQ Treatment**

**satisfaction**

|             |         |         |         |        |
|-------------|---------|---------|---------|--------|
| Unadjusted  | -2.3377 | -3.0662 | -1.6091 | 0.0000 |
| Adjusted #1 | -2.3340 | -3.0628 | -1.6052 | 0.0000 |
| Adjusted #2 | -2.0022 | -2.7301 | -1.2744 | 0.0000 |
| Adjusted #3 | -1.5644 | -2.3066 | -0.8221 | 0.0000 |
| Adjusted #4 | -1.6978 | -2.4460 | -0.9496 | 0.0000 |
| Adjusted #5 | -1.8334 | -2.5744 | -1.0924 | 0.0000 |
| Adjusted #6 | -1.3576 | -2.1207 | -0.5945 | 0.0005 |
| Adjusted #7 | -1.2230 | -1.9893 | -0.4568 | 0.0018 |

---

**SAQ Quality of life**

|             |         |         |         |        |
|-------------|---------|---------|---------|--------|
| Unadjusted  | -6.5675 | -7.9016 | -5.2334 | 0.0000 |
| Adjusted #1 | -6.6796 | -8.0017 | -5.3576 | 0.0000 |
| Adjusted #2 | -6.3279 | -7.6470 | -5.0088 | 0.0000 |
| Adjusted #3 | -4.9086 | -6.1874 | -3.6299 | 0.0000 |
| Adjusted #4 | -5.0658 | -6.3461 | -3.7856 | 0.0000 |
| Adjusted #5 | -5.2288 | -6.4957 | -3.9620 | 0.0000 |
| Adjusted #6 | -3.6724 | -4.9569 | -2.3879 | 0.0000 |
| Adjusted #7 | -3.5112 | -4.8015 | -2.2210 | 0.0000 |

---

Abbreviations: PCS= physical component summary score, MCS= mental component summary score, SAQ= Seattle angina questionnaire, UI= utility index score, VAS= visual analog score

The following covariates are sequentially included in the adjusted models:

Unadjusted Model: Sex alone and random effect of intercept among patients

Adjusted Model #1= Unadjusted Model and Time (with random effect among patients)

Adjusted Model #2= Adjusted Model #1 and socio-demographics (age, race, marital status)

Adjusted Model #3= Adjusted Model #2 and socio-economic status (education status, work status, insurance status, site location).

Adjusted Model #4= Adjusted Model #3 and cardiovascular risk factors (current smoking, hypertension, diabetes, dyslipidemia, obesity [BMI<sup>3</sup>30 kg/m<sup>2</sup>])

Adjusted Model #5= Adjusted Model #4 and medical History (prior CAD, prior angina, prior Stroke/TIA, prior PAD, history of sleep apnea, congestive heart failure, renal dysfunction).



Adjusted Model #6= Adjusted Model #5 and non-cardiac co-morbidities (COPD/lung disease, illicit drug use, autoimmune, history of alcohol abuse, depression, cancer).

Adjusted Model #7= Adjusted Model #6 and disease Severity (initial HR, initial SBP, STEMI, ejection fraction <40%, GRACE score, peak troponin, presentation within 6 hours)
